# Supplementary material for: Selective detection of cesium by a water-soluble fluorescent molecular sensor based on a calix[4]arene-bis(crown-6-ether)
Source: Royal Society of Chemistry journal article supplement (doi:10.1039/b609466j), 2006-01-01

## Supporting information

Fig SI1 : Titration curve obtained for the ratio of the fluorescence intensity at 420 nm with two excitation wavelength 360 nm /320 nm ( $I_{360}/I_{320}$ ) upon caesium addition.

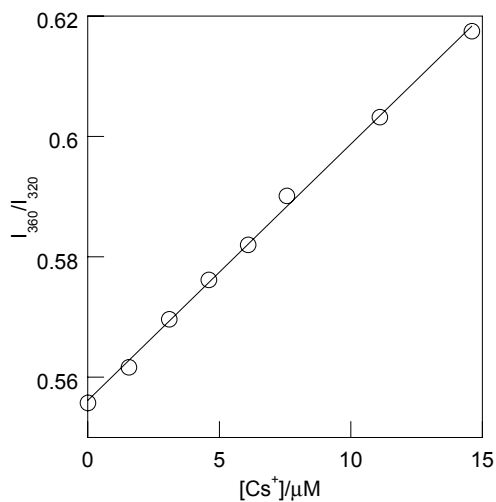

Fig. SI2 :

Partial <sup>1</sup>H NMR spectra (D<sub>2</sub>O) at 25 °C, 300 MHz : (a) free ligand **2**, C = 0.013 M (b) complex of **2** with Cs(OAc) (4 eq.)

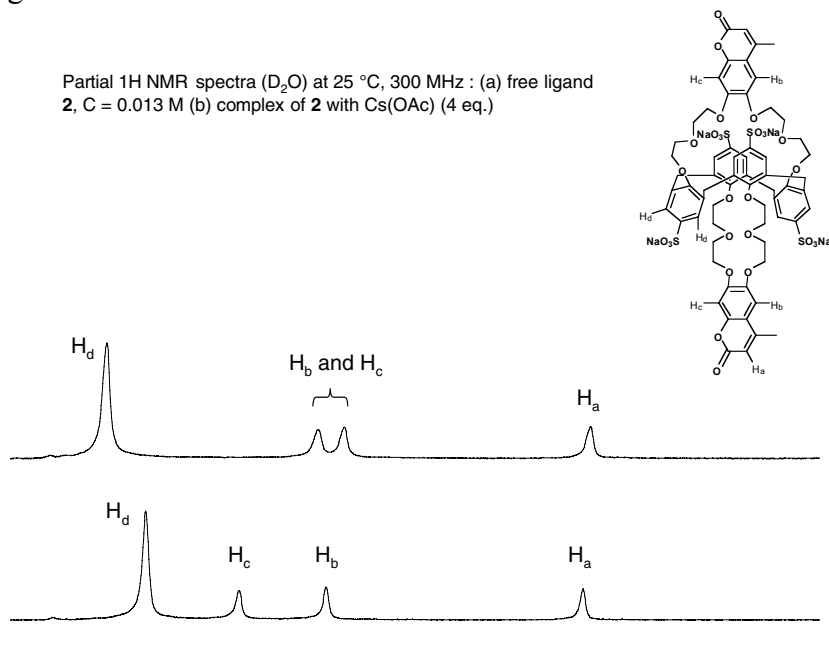

Supplement: b609466j.pdf [file b609466j.pdf]
